# Supplementary material
Source: PubMed Central journal article supplement (PMC5389963)

**Biophysical Journal, Volume 112**

**Supplemental Information**

**A Role of BK Channel in Regulation of Ca<sup>2+</sup> Channel in Ventricular Myocytes by Substrate Stiffness**

**Hucheng Zhao, Yang Yu, Xiaoan Wu, Sisi Liu, Bailin Liu, Jing Du, Bo Li, Linhua Jiang, and Xiqiao Feng**

## Supporting Material

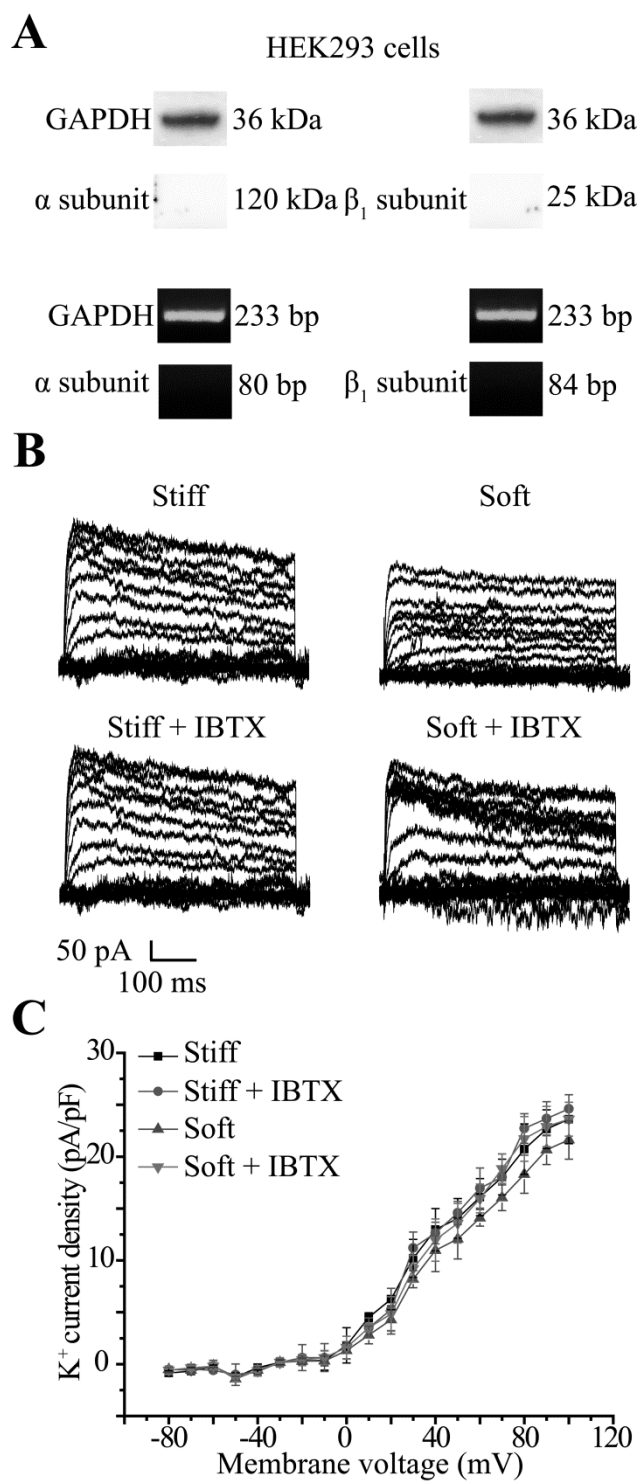

**Fig. S1 Endogenous expression of BK channel  $\alpha$  and  $\beta_1$  subunits and K<sup>+</sup> currents in HEK293**

(A) Representative western blots showing lack of protein (upper panels) and mRNA expression (lower panels) of the BK channel  $\alpha$  and  $\beta_1$  subunits in HEK293 cells on the soft and stiff substrates. (B) Representative whole-cell recordings of K<sup>+</sup> channel

currents from HEK293 cells on the soft and stiff substrates (upper panels) and 10 min after application of 100 nM IBTX (lower panels). (C) Summary of the mean I-V relationship curves of the  $K^+$  channel currents from 11 cells in three preparations.

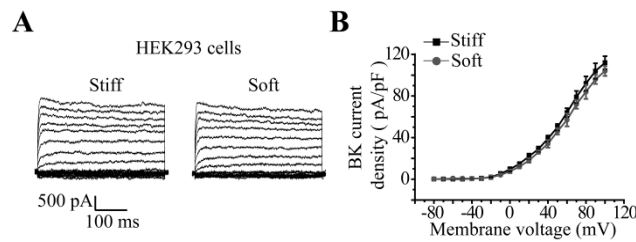

**Fig S2 Effect of substrate stiffness on STREX-deleted BK channel current.**

(A) Representative whole-cell recordings of  $Ba^{2+}$  currents from HEK cells heterologously expressing the BK channel STREX-deleted  $\alpha$  and  $\beta_1$  subunits cultured on the soft and stiff substrates. (B) Mean I-V relationship curves from 9 cells in three preparations.

**Original western blot results of Cav1.2 in ventricular myocytes.**

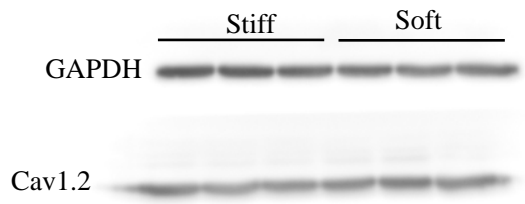

**Original western blot results of  $\alpha$  subunit from BK in ventricular myocytes.**

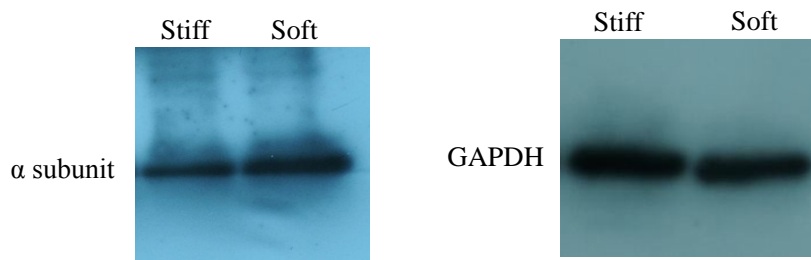

**Original western blot results of  $\beta$  subunit from BK in ventricular myocytes.**

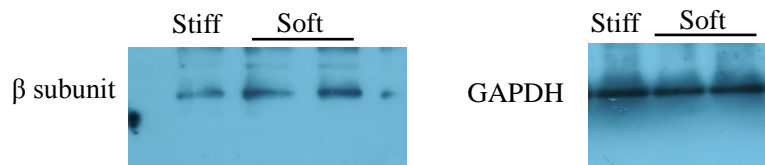

**Original PCR results from ventricular myocytes.**

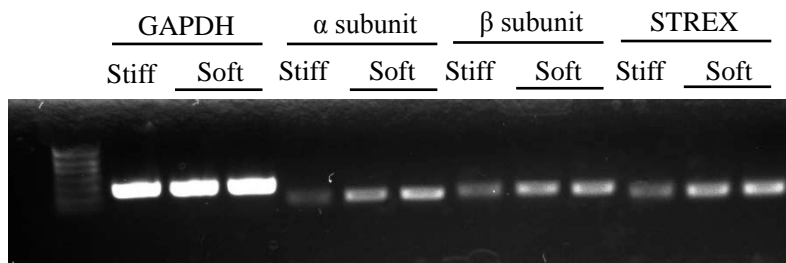

**Original PCR results of HEK293 cells.**

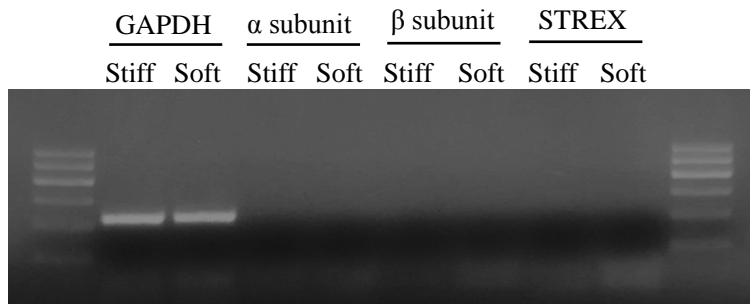

**Original western blot results of HEK293 cells.**

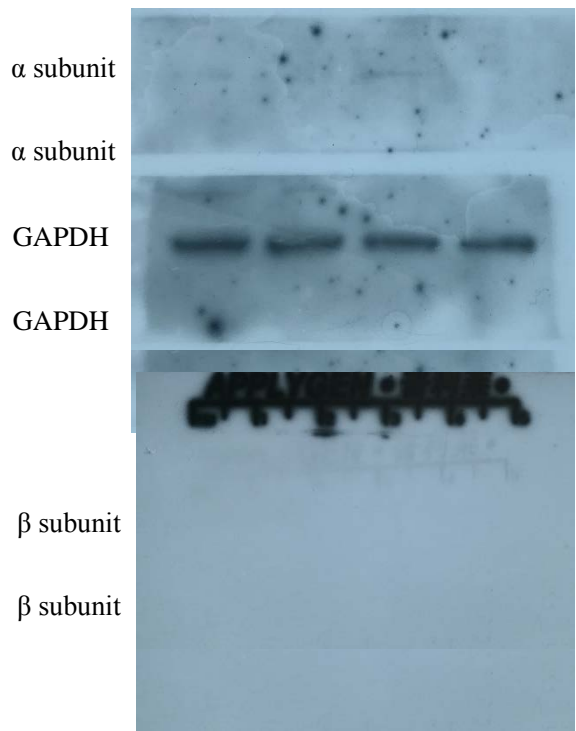

Supplement: mmc1.pdf [file mmc1.pdf]
